# Supplementary material for: Neuroinflammatory transcriptional programs induced in rhesus pre-frontal cortex white matter during acute SHIV infection
Source: PubMed Central journal article supplement (PMC9535930; doi:10.1186/s12974-022-02610-y), 2022-10-06
Supplement: 12974_2022_2610_MOESM1_ESM.pdf [file 12974_2022_2610_MOESM1_ESM.pdf]

# PFCw

17,717 genes

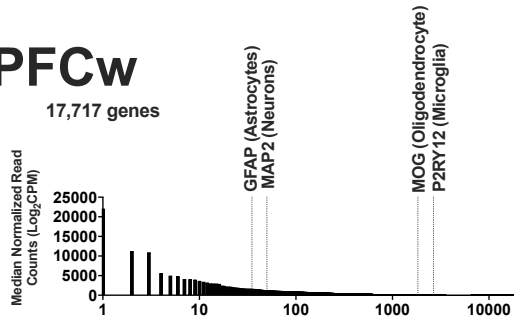

# STS

17,221 genes

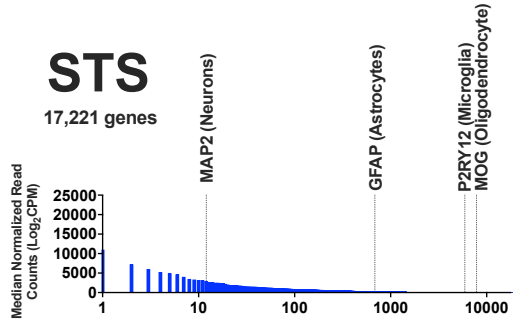

# CN

17,861 genes

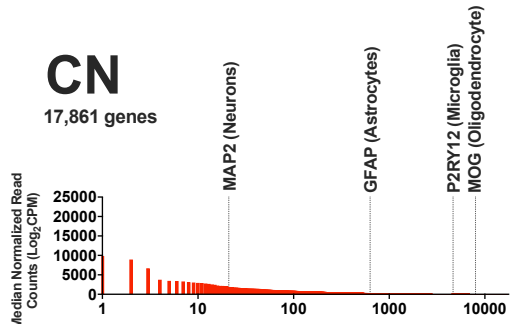

# HP

17,550 genes

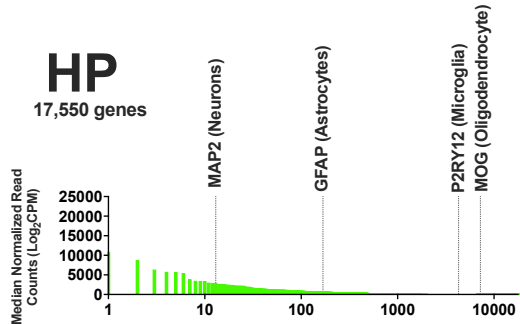

Ranked Genes

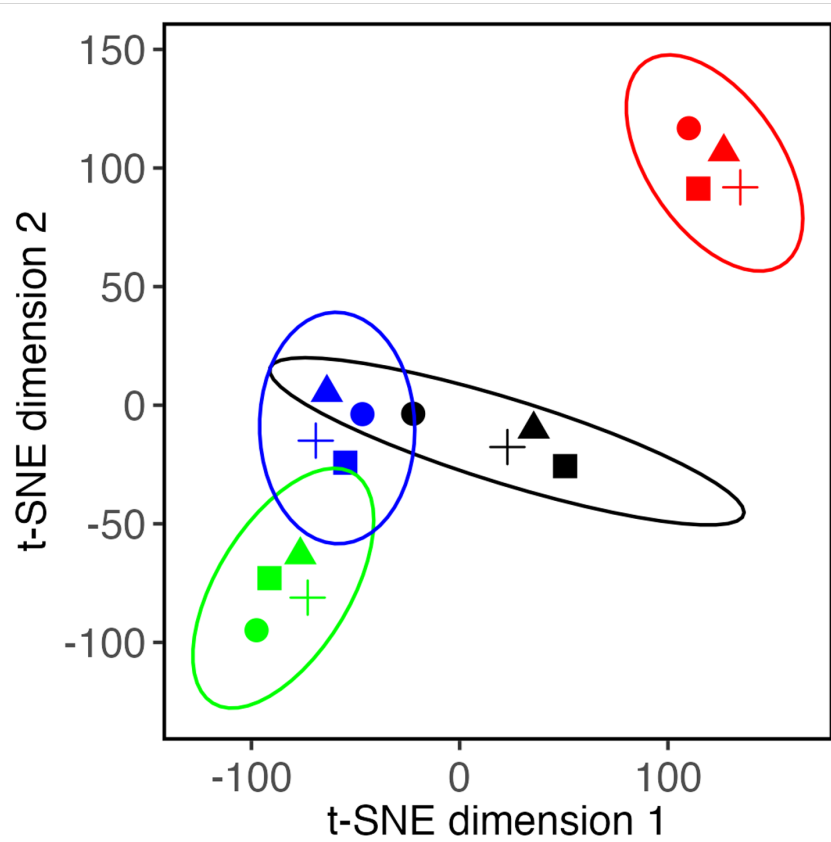

### Animal

- 43361
- ▲ 44003
- 44288
- + 45821

### Brain Region

- Pre-frontal cortex white matter
- Caudate Nucleus
- Hippocampus
- Superior Temporal Sulcus

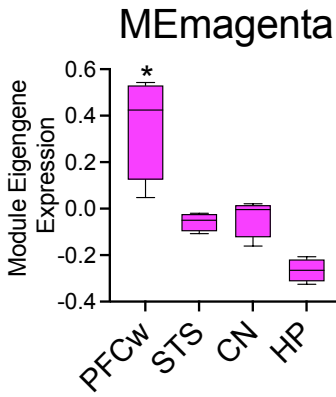

- cellular response to glucocorticoid stimulus
- nucleosome mobilization
- RNA metabolic process
- microvillus organization
- response to antineoplastic agent
- negative regulation of cellular component organization
- amyloid-beta clearance
- regulation of extrinsic apoptotic signaling pathway via death domain receptors
- dendritic transport
- axo-dendritic protein transport
- negative regulation of extrinsic apoptotic signaling pathway
- regulation of RNA metabolic process
- apical junction assembly
- regulation of macromolecule biosynthetic process
- response to arsenic-containing substance

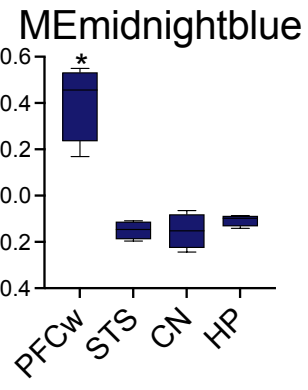

- positive regulation of dendritic spine development
- N-glycan fucosylation
- positive regulation of L-glutamate import across plasma membrane
- regulation of dendritic spine maintenance
- arsonoacetate metabolic process
- activation of cysteine-type endopeptidase activity involved in apoptotic process by cytochrome c
- negative regulation of core promoter binding
- Cajal-Retzius cell differentiation
- regulation of granulosa cell apoptotic process
- negative regulation of nucleotide-binding oligomerization domain containing 2 signaling pathway
- smooth endoplasmic reticulum calcium ion homeostasis
- positive regulation of amyloid fibril formation
- negative regulation of monocyte chemotactic protein-1 production
- negative regulation of mitochondrial depolarization
- synaptic vesicle targeting

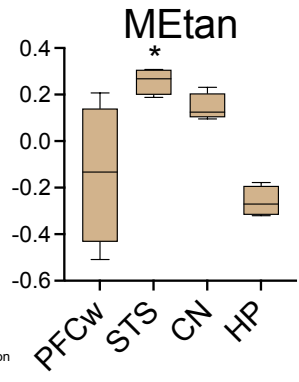

- mechanosensory behavior
- cation transport
- neuron projection arborization
- regulation of ketone biosynthetic process
- regulation of cholesterol metabolic process
- calcium ion-regulated exocytosis of neurotransmitter
- cellular response to calcium ion
- release of sequestered calcium ion into cytosol
- metal ion transport
- neutral lipid metabolic process
- acylglycerol metabolic process
- rhythmic behavior
- circadian behavior
- circadian temperature homeostasis
- protein demalonylation

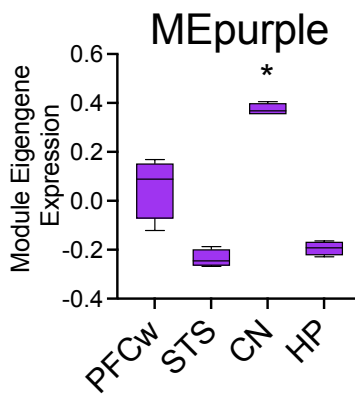

- spermatogenesis
- DNA methylation involved in gamete generation
- auditory receptor cell morphogenesis
- cochlea development
- neural precursor cell proliferation
- stem cell proliferation
- cellular response to amino acid stimulus
- cellular response to organonitrogen compound
- insulin receptor signaling pathway
- positive regulation of mRNA splicing, via spliceosome
- regulation of neural precursor cell proliferation
- response to amino acid
- regulation of cell shape
- mucopolysaccharide metabolic process
- eye development

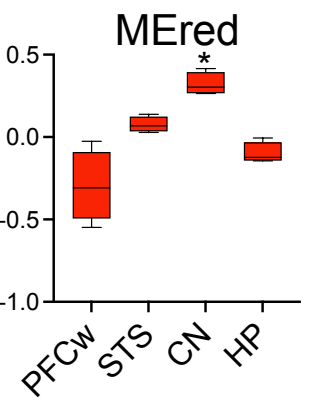

- modulation of chemical synaptic transmission
- neutrophil extravasation
- postsynaptic neurotransmitter receptor diffusion trapping
- monocyte extravasation
- calcium ion transport
- inorganic cation transmembrane transport
- cellular response to hormone stimulus
- heme biosynthetic process
- ATP metabolic process
- neurotransmitter transport
- cellular response to glucose stimulus
- cellular respiration
- adenylyate cyclase-activating dopamine receptor signaling pathway
- negative regulation of transcription by RNA polymerase III
- presynaptic modulation of chemical synaptic transmission

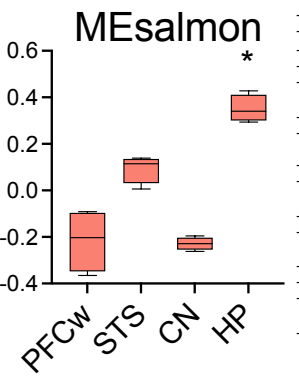

- psychomotor behavior
- social behavior
- neuron projection development
- synaptic vesicle priming
- regulation of cell morphogenesis involved in differentiation
- microtubule polymerization
- positive regulation of protein modification by small protein conjugation or removal
- long-term memory
- regulation of microtubule polymerization or depolymerization
- negative regulation of endothelial cell proliferation
- positive regulation of substrate adhesion-dependent cell spreading
- positive regulation of transferase activity
- synaptic vesicle lumen acidification
- cerebral cortex GABAergic interneuron development
- nonassociative learning

Normalized Read Counts (Log<sub>2</sub>CPM)

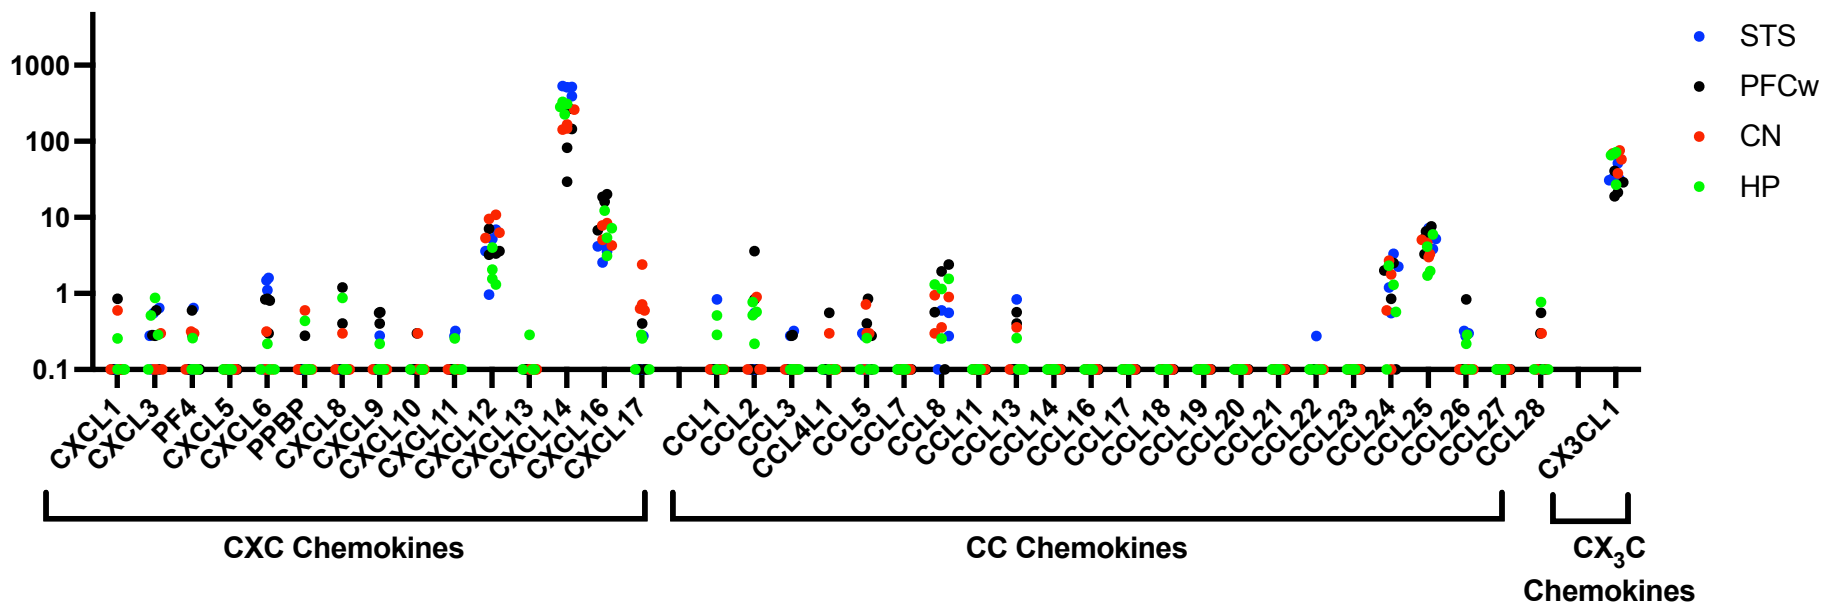

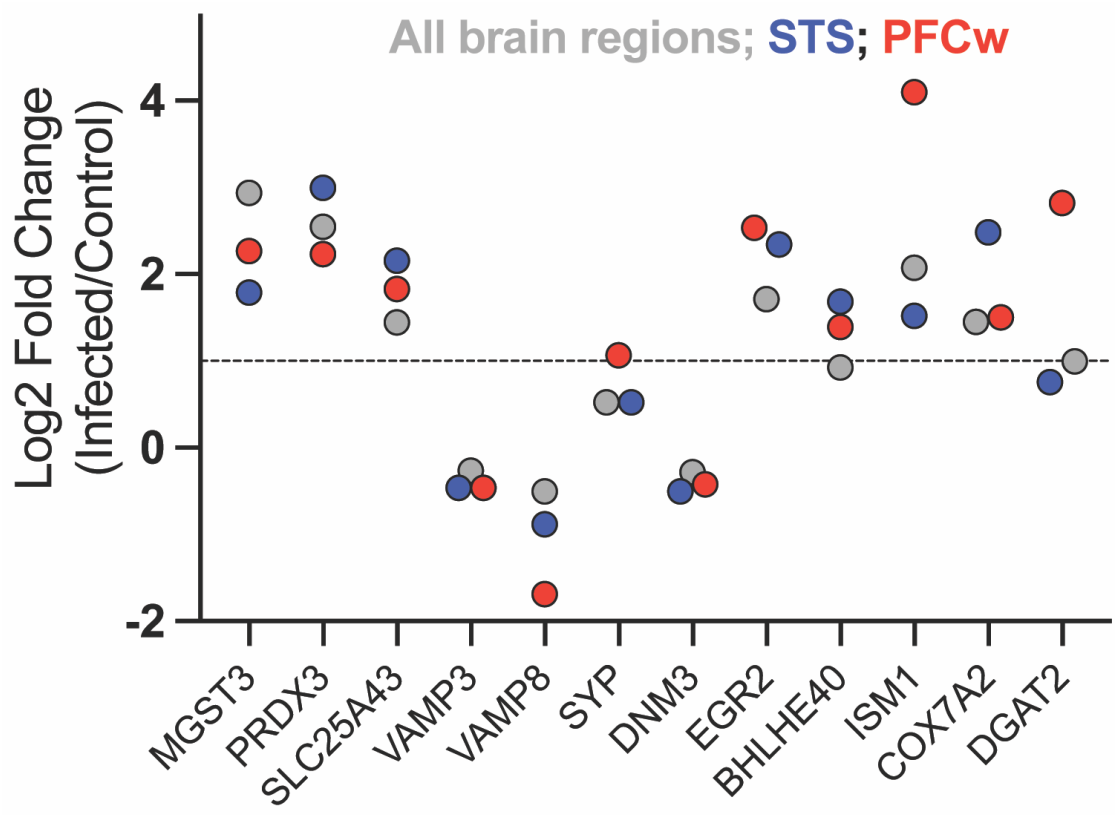

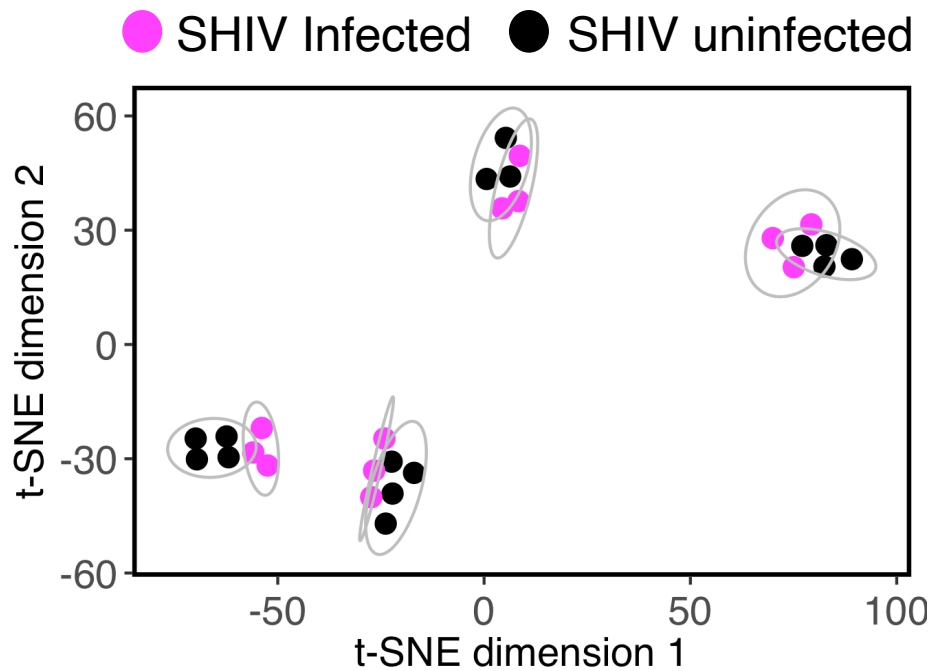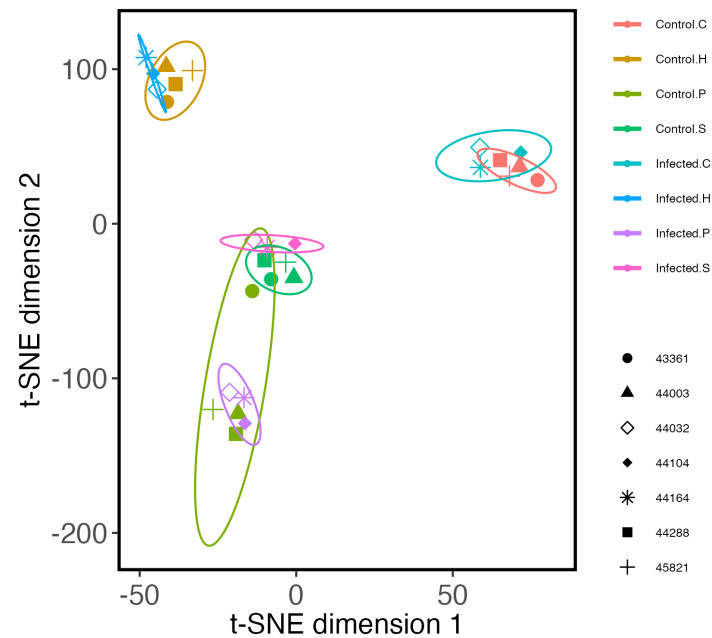

Normalized Read  
Counts

SLC6A11

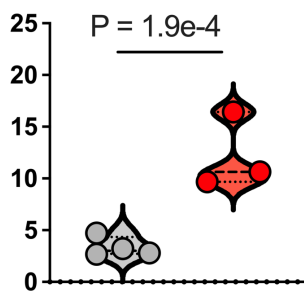

SLC32A1

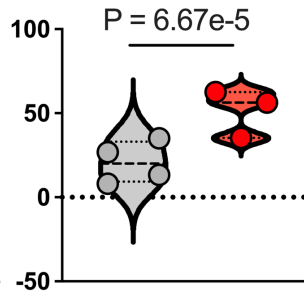

MANF

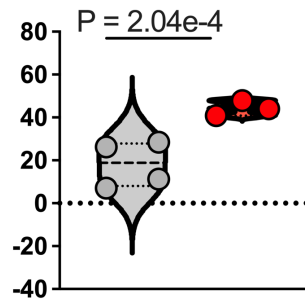

ATP5MC3

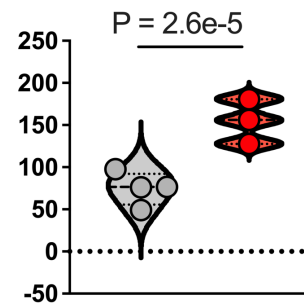

ATP6AP2

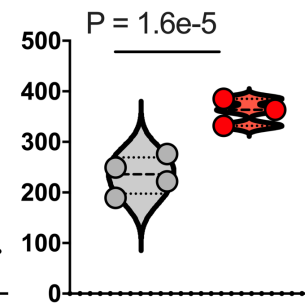

## Table S1. Animal/Sample Data

| Animal ID | Sample ID | SHIV Exposed | Sex | Age<br>(years.months) | Med cull                     | Code     | Brain tissue             | Tissue weight (mg) | A260/A280 | A260/A230 | Total RNA conc (ug) |
|-----------|-----------|--------------|-----|-----------------------|------------------------------|----------|--------------------------|--------------------|-----------|-----------|---------------------|
| 43361     | SI61      | No           | M   | 6.6                   | Right leg lameness           | SI61S-1  | Superior Temporal Sulcus | 74.0               | 2.06      | 2.24      | 25.74               |
|           |           |              |     |                       |                              | SI61H-2  | Hippocampus              | 114.2              | 2.08      | 2.27      | 39.16               |
|           |           |              |     |                       |                              | SI61C-3  | Caudate Nucleus          | 91.6               | 2.09      | 2.22      | 33.06               |
|           |           |              |     |                       |                              | SI61P-4  | PFC A46 (w)              | 53.5               | 2.07      | 2.27      | 22.96               |
| 45821     | SI21      | No           | F   | 3.6                   | Arthritis                    | SI21S-5  | Superior Temporal Sulcus | 124.8              | 2.10      | 2.30      | 53.59               |
|           |           |              |     |                       |                              | SI21H-6  | Hippocampus              | 50.5               | 2.10      | 2.25      | 31.2                |
|           |           |              |     |                       |                              | SI21C-7  | Caudate Nucleus          | 65.6               | 2.11      | 2.28      | 34.23               |
|           |           |              |     |                       |                              | SI21P-8  | PFC A46 (w)              | 39.5               | 2.10      | 2.07      | 15.3                |
| 44003     | SI03      | No           | F   | 5.11                  | Arthritis                    | SI03S-9  | Superior Temporal Sulcus | 84.2               | 2.10      | 2.31      | 50.42               |
|           |           |              |     |                       |                              | SI03H-10 | Hippocampus              | 76.7               | 2.09      | 1.86      | 30.45               |
|           |           |              |     |                       |                              | SI03C-11 | Caudate Nucleus          | 90.1               | 2.09      | 1.96      | 32.4                |
|           |           |              |     |                       |                              | SI03P-12 | PFC A46 (w)              | 72.3               | 2.05      | 2.13      | 16.8                |
| 44288     | SI88      | No           | F   | 5.9                   | Diarrhea                     | SI88S-13 | Superior Temporal Sulcus | 104.2              | 2.07      | 2.27      | 33.58               |
|           |           |              |     |                       |                              | SI88H-14 | Hippocampus              | 83.9               | 2.07      | 2.28      | 29.11               |
|           |           |              |     |                       |                              | SI88C-15 | Caudate Nucleus          | 104.5              | 2.08      | 2.25      | 31.01               |
|           |           |              |     |                       |                              | SI88P-16 | PFC A46 (w)              | 69.8               | 2.06      | 2.15      | 9.89                |
| 44164     | SI64      | Yes          | F   | 5.5                   | Euthanasia 4 weeks post SHIV | SI64S-17 | Superior Temporal Sulcus | 40.2               | 2.05      | 2.12      | 19.8                |
|           |           |              |     |                       |                              | SI64H-18 | Hippocampus              | 50.4               | 2.07      | 2.20      | 27.57               |
|           |           |              |     |                       |                              | SI64C-19 | Caudate Nucleus          | 35.9               | 2.06      | 1.89      | 20.32               |
|           |           |              |     |                       |                              | SI64P-20 | PFC A46 (w)              | 26.7               | 2.07      | 2.22      | 14.45               |
| 44104     | SI04      | Yes          | F   | 5.2                   | Euthanasia 4 weeks post SHIV | SI04S-21 | Superior Temporal Sulcus | 52.3               | 2.08      | 2.30      | 29.22               |
|           |           |              |     |                       |                              | SI04H-22 | Hippocampus              | 43.3               | 2.06      | 2.29      | 21.26               |
|           |           |              |     |                       |                              | SI04C-23 | Caudate Nucleus          | 47.2               | 2.07      | 2.37      | 21.64               |
|           |           |              |     |                       |                              | SI04P-24 | PFC A46 (w)              | 17.0               | 2.08      | 2.18      | 9.6                 |
| 44032     | SI25      | Yes          | F   | 5.6                   | Euthanasia 4 weeks post SHIV | SI32S-25 | Superior Temporal Sulcus | 46.5               | 2.07      | 2.24      | 21.56               |
|           |           |              |     |                       |                              | SI32H-26 | Hippocampus              | 54.3               | 2.06      | 2.20      | 23.57               |
|           |           |              |     |                       |                              | SI32C-27 | Caudate Nucleus          | 40.6               | 2.08      | 2.22      | 19.22               |
|           |           |              |     |                       |                              | SI32P-28 | PFC A46 (w)              | 43.5               | 2.06      | 2.21      | 20.06               |



**Table S3 Flow Cytometry Reagents**

| <b>Reagent</b>          | <b>Fluorochrome</b> | <b>Clone</b> | <b>Catalog no.</b> | <b>Source</b>     |
|-------------------------|---------------------|--------------|--------------------|-------------------|
| <b>PD-1</b>             | PE-Cy7              | EH12.2H7     | 329918             | Biolegend         |
| <b>CD3</b>              | AF700               | SP34-2       | 557917             | BD Biosciences    |
| <b>CD4</b>              | BV650               | L200         | 563737             | BD Biosciences    |
| <b>CD8</b>              | BV510               | SK1          | 563919             | BD Biosciences    |
| <b>CD20</b>             | BV421               | 2H7          | 302328             | Biolegend         |
| <b>CD95</b>             | BUV 737             | DX2          | 564710             | BD Bioscience     |
| <b>Live/Dead</b>        | APC-Cy7             |              | L34976             | Life Technologies |
| <b>CXCR3</b>            | APC                 | IC6          | 550967             | BD Biosciences    |
| <b>CD45</b>             | AF-488              | HI30         | 557803             | BD Biosciences    |
| <b>CD11b</b>            | BV-510              | ICRF44       | 563088             | Thermofisher      |
| <b>HLA-DR</b>           | BV-785              | L243         | 307642             | Biolegend         |
| <b>CCR6</b>             | PE-Dazzle           | G034e3       | 353430             | Biolegend         |
| <b>Cytofix/cytoperm</b> |                     |              | 51-2090KZ          | BD Biosciences    |
